# Supplementary material
Source: PubMed Central journal article supplement (PMC5992055)
Supplement: NIHMS949729-supplement-Supp_FigS1.pdf [file NIHMS949729-supplement-Supp_FigS1.pdf]

Figure S1. Validation of Previous Serum Buprenorphine PK Model.

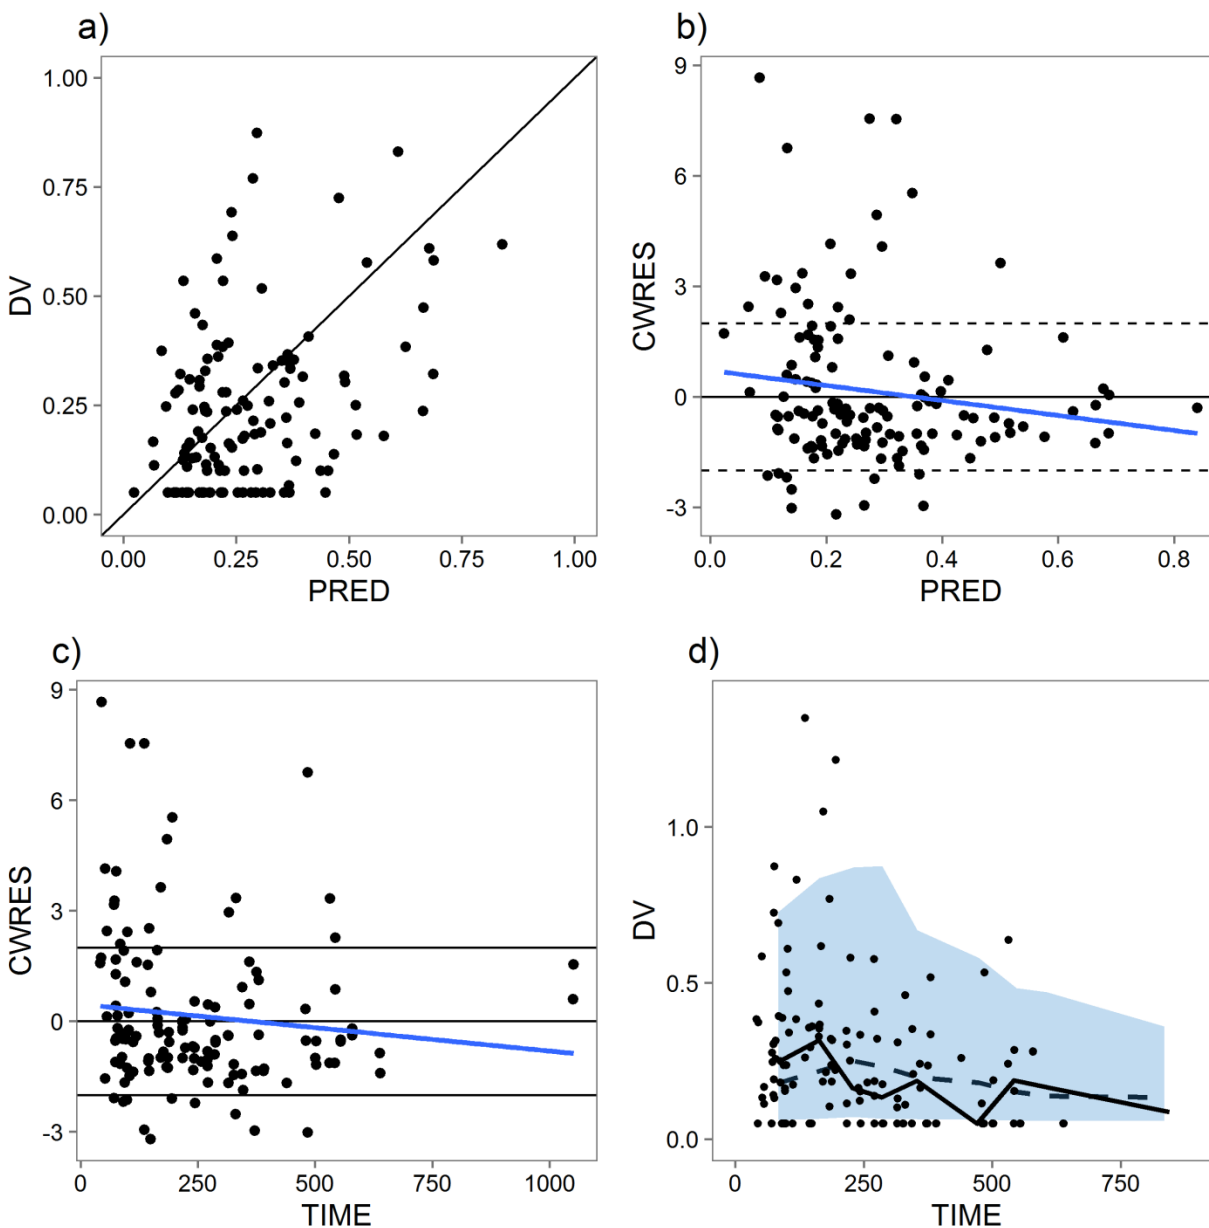

A) Population predictions vs observed values. B) Conditional weighted residuals (CWRES) vs population predictions. C) CWRES vs time. D) Visual Predictive Check (VPC). The black circles represent the observed buprenorphine concentrations. The black solid line represents the median concentration of the observed data. The black dotted line represents the median concentrations of the simulated data. The shaded area represents the 95% confidence interval of the simulated data.
