# Supplementary material
Source: PubMed Central journal article supplement (PMC5992055)
Supplement: NIHMS949729-supplement-Supp_FigS2.pdf [file NIHMS949729-supplement-Supp_FigS2.pdf]

Figure S2. Serum Buprenorphine PK Model Predictive Checks.

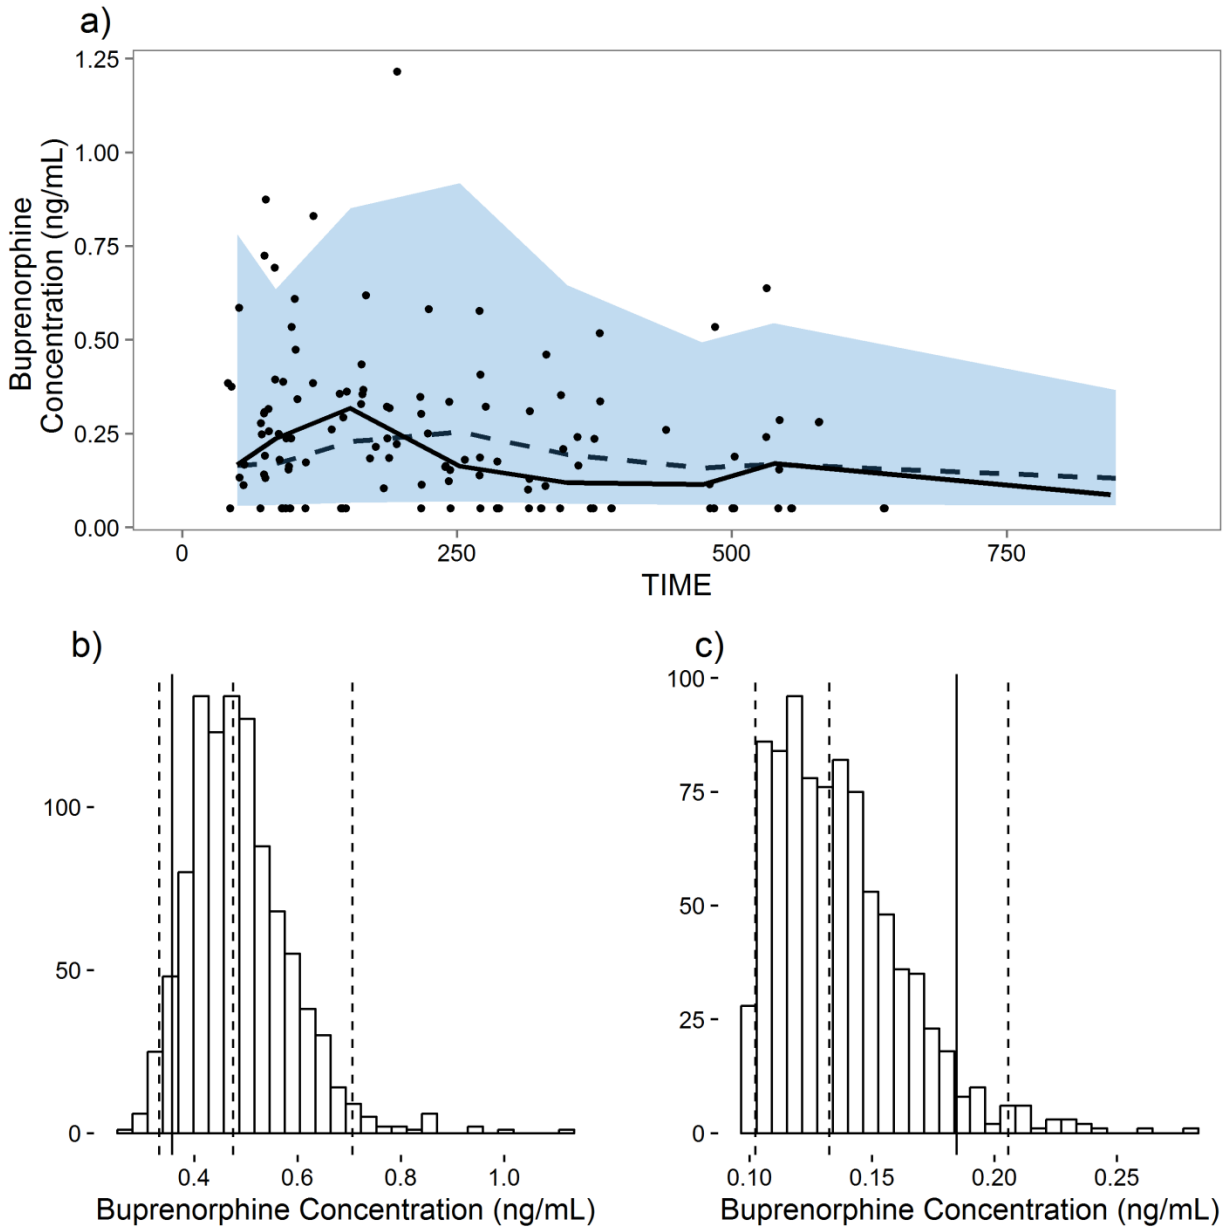

A) VPC. The solid black line represents the median of the observed data. The blue shaded area and dotted black line represent the 95% CI and median of the simulated data, respectively. B-C) Clinical predictive check. The histogram represents the predictive distribution of the B) trough and C) peak concentrations from the 1000 simulated datasets. The solid black line represents the median of the observed data. The dotted black lines represent the 95% CI and median of the simulated data.
