# Supplementary material
Source: PubMed Central journal article supplement (PMC5992055)
Supplement: NIHMS949729-supplement-Supp_FigS4.pdf [file NIHMS949729-supplement-Supp_FigS4.pdf]

Figure S4. Serum Norbuprenorphine PK Model VPC.

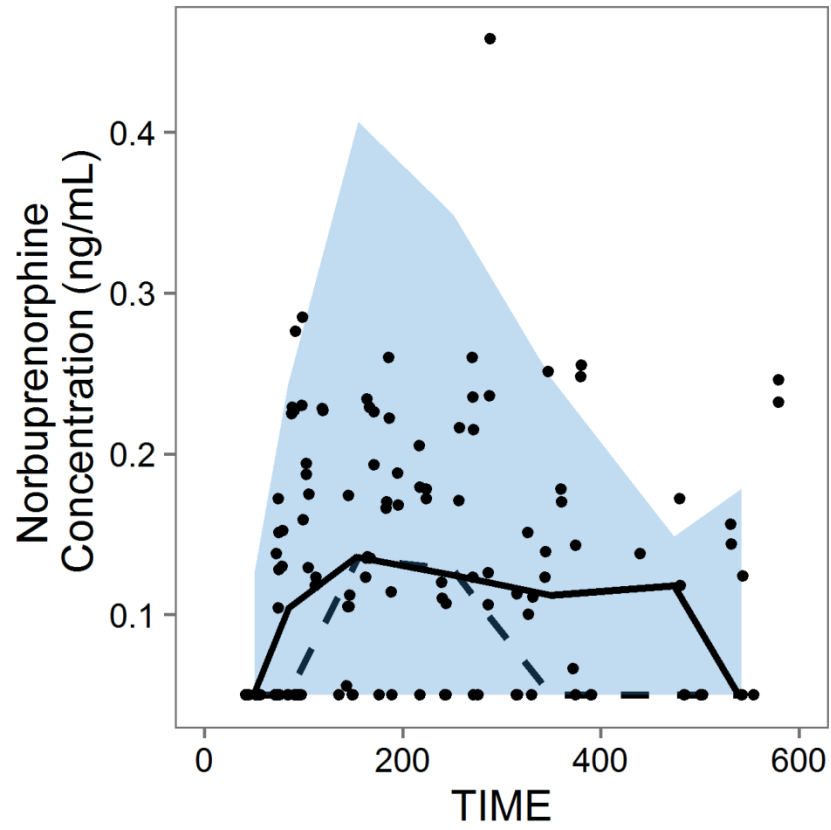

The solid black line represents the median of the observed data. The blue shaded area and dotted black line represent the 95% CI and median of the simulated data, respectively.
