# Supplementary material
Source: PubMed Central journal article supplement (PMC5992055)
Supplement: NIHMS949729-supplement-Supp_FigS5.pdf [file NIHMS949729-supplement-Supp_FigS5.pdf]

Figure S5. Serum Norbuprenorphine PK Model pvcVPC

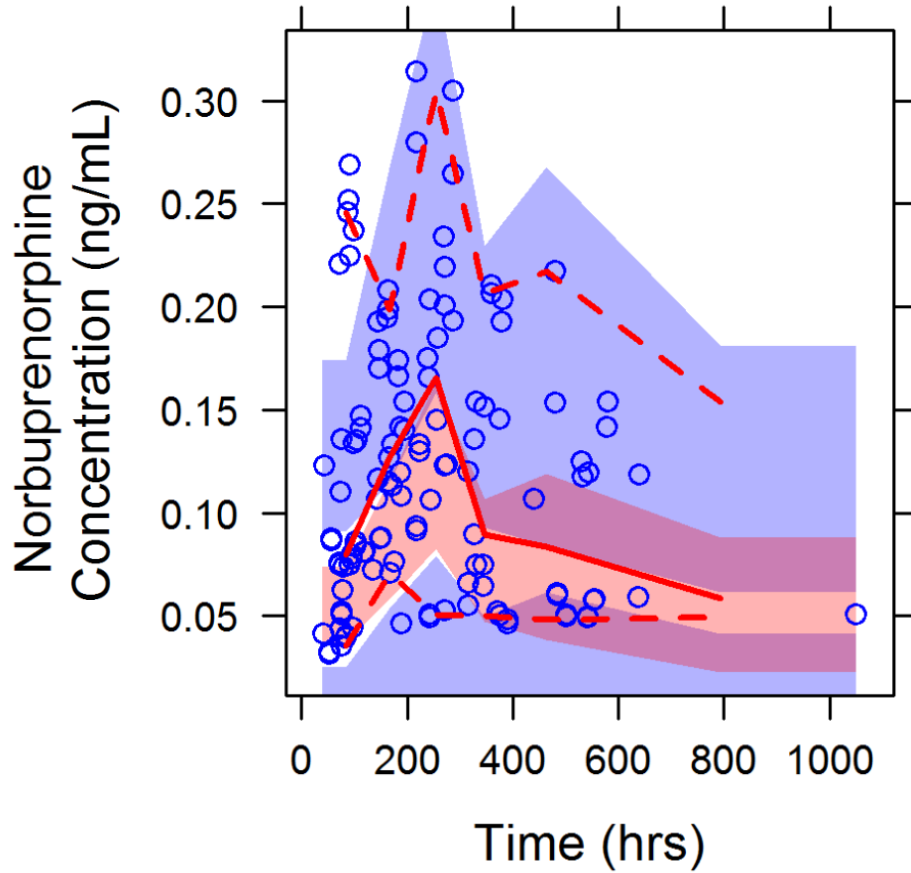

The dashed lines represent the 5<sup>th</sup> and 95<sup>th</sup> percentiles of the observed data. The solid line represents the median of the observed data. The red shaded area represents the 95% prediction interval of the median. The blue shaded areas represent the 95% prediction intervals of the 5<sup>th</sup> and 95<sup>th</sup> percentiles. The blue dots represent observed data.
