# Supplementary material
Source: PubMed Central journal article supplement (PMC5992055)
Supplement: NIHMS949729-supplement-Supp_FigS6.pdf [file NIHMS949729-supplement-Supp_FigS6.pdf]

Figure S6. Serum Buprenorphine-NAS PK-PD Model Predictive Checks

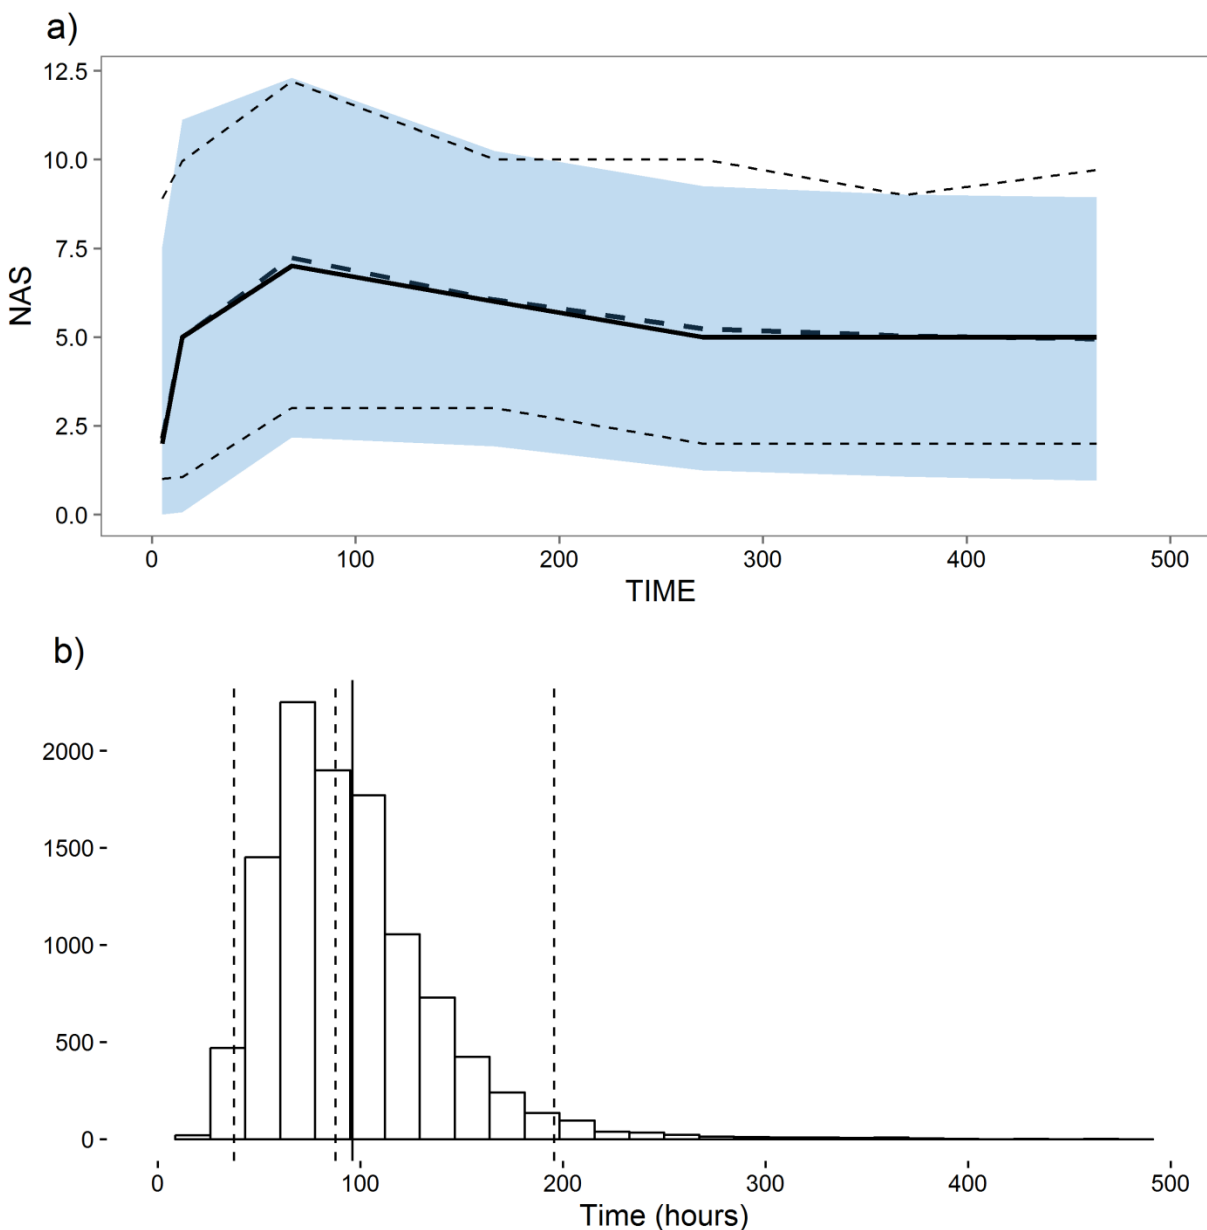

A) VPC. The black solid line represents the median concentration of the observed data. The heavy black dashed line represents the median concentrations of the simulated data. The shaded area represents the 95% confidence interval (CI) of the simulated data. The light dashed lines represent the 95% interval of the observed data around the median. B) Buprenorphine NAS PK-PD Predictive Check of Time to NAS Stabilization showing the calculated times to stabilization of 1000 simulations of NAS disease courses with the dotted lines representing the median and 95% CI of the simulations and the black line representing the median of the observed data.
