# Supplementary material
Source: PubMed Central journal article supplement (PMC5992055)
Supplement: NIHMS949729-supplement-Supp_TableS1.pdf [file NIHMS949729-supplement-Supp_TableS1.pdf]

Table S1. Urine Pharmacokinetic Data

| Compound                           | Mean<br>(ng/mL) | Standard Deviation<br>(ng/mL) | Minimum<br>(ng/mL) | Maximum<br>(ng/mL) |
|------------------------------------|-----------------|-------------------------------|--------------------|--------------------|
| Buprenorphine                      | 0.50            | 0.24                          | 0.17               | 0.85               |
| Norbuprenorphine                   | 5.13            | 3.43                          | 0.86               | 12.30              |
| Buprenorphine-3-<br>glucuronide    | 25.42           | 14.84                         | 6.47               | 48.20              |
| Norbuprenorphine<br>-3-glucuronide | 24.29           | 19.04                         | 4.76               | 66.30              |
